# Supplementary material for: A chromosome 4 trisomy contributes to increased fluconazole resistance in a clinical isolate of Candida albicans
Source: PubMed Central journal article supplement (PMC5737213; doi:10.1099/mic.0.000478), 2017-06-22
Supplement: mic-163-856-s001.pdf [file mic-163-856-s001.pdf]

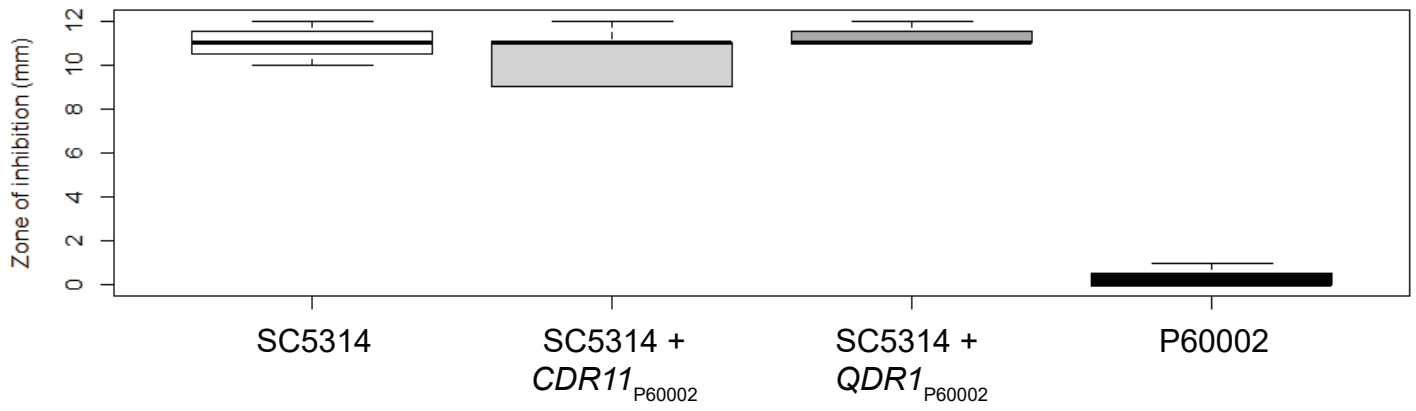

Figure S1

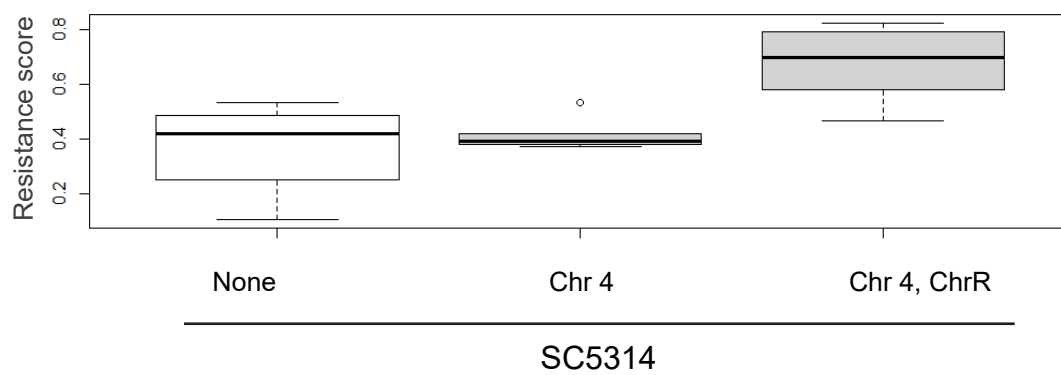

Figure S2

**Table S1. Strains used in this study.**

| <b>Strain(s)</b>  | <b>Genotype</b>                            | <b>Strain Background</b> |
|-------------------|--------------------------------------------|--------------------------|
| CAY682            | WT (Trisomic Chr4, Chr6)                   | SC5314                   |
| CAY704/7401       | WT                                         | P60002                   |
| CAY6714/6715/6716 | QDR1/qdr1::QDR1 <sub>P60002</sub> -SAT1    | SC5314                   |
| CAY6897/6898      | CDR11/cdr11::CDR11 <sub>P60002</sub> -SAT1 | SC5314                   |
| CAY7402/7403/7405 | Trisomic Chr4, Disomic Chr6                | P60002                   |
| CAY7413/7414/7416 | Disomic Chr4, Trisomic Chr6                | P60002                   |
| CAY7417/7418/7419 | Disomic Chr4, Disomic Chr6                 | P60002                   |
| CAY3102/3121      | Trisomic Chr4                              | SC5314                   |
| CAY3105/3106      | Trisomic ChrR, Trisomic Chr4               | SC5314                   |
| CAY3108           | Trisomic Chr4, Trisomic Chr7               | SC5314                   |

**Table S2. Oligonucleotides used in this study.**

| <b>Oligo</b> | <b>Name</b>            | <b>Sequence</b>                      |
|--------------|------------------------|--------------------------------------|
| 1            | CDR11_Amplification_F  | AACCGCGGCCCTCCTCTCC<br>AACAAATT      |
| 2            | CDR11_Amplification_R  | AAGCGGCCGCCCCAACTTGCA<br>TTCAGATTCCG |
| 3            | CDR11_Integrand        | GTCAAACAATGGTGCTGCAG                 |
| 4            | SacII_5pr_QDR1_cloning | AACCGCGGGCCTGATTCTATA<br>CGACGAC     |
| 5            | NotI_3pr_QDR1_cloning  | AAGCGGCCGCCCATTTCATCAA<br>CGGGTCTAC  |
| 6            | QDR1_Integrand         | ACAGAGTGGTGCATCTGCT                  |
| 7            | CDR11_qRTPCR_577_F     | ATTGCTGTCAACACGTATGG                 |
| 8            | CDR11_qRTPCR_817_R     | CATCGGCCATACGTTTAGCA                 |
| 9            | QDR1_qRTPCR_352_F      | TGTGCCGTGTGCATTGCTAT                 |
| 10           | QDR1_qRTPCR_520_R      | AACCAGAACTGCACCAACC                  |
| 11           | Candida_ACT1_F_qRTPCR  | TTGTA CTCTTCTGGTAGAAC                |
| 12           | Candida_ACT1_R_qRTPCR  | GTTTGGTCAATACCAGCAGC                 |

**Table S3. Polymorphisms in the CDR11 CDS.**

| Position     | SC5314 allele | P60002 allele | Allele Frequency |
|--------------|---------------|---------------|------------------|
| Chr3: 849070 | G             | A             | 1.0              |
| Chr3:849180  | G             | A             | 1.0              |
| Chr3:849480  | C             | T             | 0.5              |
| Chr3:849492  | A             | G             | 0.5              |
| Chr3:849582  | C             | T             | 0.5              |
| Chr3:849603  | T             | C             | 0.5              |
| Chr3:849660  | A             | G             | 0.5              |
| Chr3:849666  | G             | A             | 1.0              |
| Chr3:849669  | A             | G             | 1.0              |
| Chr3:849702  | G             | A             | 0.5              |
| Chr3:849720  | G             | A             | 0.5              |
| Chr3:849768  | C             | T             | 0.5              |
| Chr3:849840  | C             | T             | 1.0              |
| Chr3:849852  | T             | C             | 1.0              |
| Chr3:849919  | C             | T             | 1.0              |
| Chr3:850035  | G             | A             | 1.0              |
| Chr3:850184  | T             | C             | 1.0              |
| Chr3:850302  | C             | T             | 1.0              |
| Chr3:850323  | A             | G             | 1.0              |
| Chr3:850341  | G             | A             | 1.0              |
| Chr3:850347  | A             | G             | 1.0              |
| Chr3:850353  | A             | G             | 1.0              |
| Chr3:850398  | G             | A             | 1.0              |
| Chr3:850539  | G             | A             | 1.0              |
| Chr3:850551  | C             | G             | 1.0              |
| Chr3:850623  | G             | A             | 1.0              |
| Chr3:850722  | C             | T             | 0.5              |
| Chr3:850810  | C             | T             | 1.0              |
| Chr3:850841  | T             | C             | 1.0              |
| Chr3:850926  | C             | T             | 0.5              |
| Chr3:850971  | C             | T             | 0.5              |
| Chr3:850980  | A             | G             | 0.5              |
| Chr3:851072  | C             | G             | 1.0              |
| Chr3:851166  | T             | C             | 1.0              |
| Chr3:851235  | A             | G             | 1.0              |
| Chr3:851352  | G             | A             | 0.5              |
| Chr3:851447  | A             | G             | 0.5              |
| Chr3:851739  | C             | T             | 1.0              |
| Chr3:852186  | A             | T             | 1.0              |
| Chr3:852348  | C             | T             | 1.0              |
| Chr3:852375  | G             | A             | 1.0              |
| Chr3:852486  | T             | A             | 0.5              |
| Chr3:852508  | C             | T             | 1.0              |
| Chr3:852706  | C             | G             | 0.5              |
| Chr3:852790  | G             | A             | 1.0              |
| Chr3:853167  | G             | A             | 1.0              |
| Chr3:853221  | G             | T             | 0.5              |
| Chr3:853236  | G             | A             | 1.0              |

**Table S4. Polymorphisms in *QDR1* CDS.**

| Position   | SC5314 allele | P60002 allele | Allele Frequency |
|------------|---------------|---------------|------------------|
| ChrR941236 | A             | G             | 1.0              |
| ChrR941290 | T             | C             | 1.0              |
| ChrR941386 | A             | G             | 1.0              |
| ChrR941974 | C             | T             | 1.0              |
| ChrR942002 | C             | A             | 1.0              |
| ChrR942576 | G             | A             | 1.0              |
| ChrR942616 | C             | T             | 1.0              |
| ChrR942649 | G             | T             | 1.0              |

**Table S5. Polymorphisms in the *CDR11* promoter.**

| <b>Position</b> | <b>SC5314 allele</b> | <b>P60002 allele</b> |
|-----------------|----------------------|----------------------|
| Chr3: 853725    | C                    | A                    |
| Chr3: 853713    | G                    | T                    |
| Chr3: 853692    | A                    | G                    |
| Chr3: 853686    | G                    | A                    |

**Table S6. Polymorphisms in the *QDR1* promoter.**

| <b>Position</b> | <b>SC5314 allele</b> | <b>P60002 allele</b> |
|-----------------|----------------------|----------------------|
| ChrR: 943319    | A                    | G                    |
| ChrR: 943131    | G                    | A                    |
| ChrR: 942999    | G                    | A                    |
| ChrR: 942928    | G                    | A                    |
| ChrR: 942901    | A                    | G                    |
| ChrR: 942791    | G                    | A                    |
| ChrR: 942754    | T                    | G                    |



1 **SUPPLEMENTARY FIGURE LEGENDS**

2 **Figure S1. Zone of clearance is unaltered in SC5314 encoding *CDR11*<sub>P60002</sub> or**  
3 ***QDR1*<sub>P60002</sub> alleles.** The zone of inhibition restricting 20% of growth was measured for  
4 each strain with 4-6 independent replicates.

5 **Figure S2. An aneuploid derivative of SC5314 exhibits increased fluconazole**  
6 **resistance. A.** Analysis of fluconazole resistance in SC5314, two SC5314-derived  
7 isolates trisomic for Chr4, and an SC5314-derived strain trisomic for ChrR and Chr4.  
8 Drug resistance for these isolates was collected from experiments with five to six  
9 independent replicates.

10 **Table S1. Strains used in this study.**

11 **Table S2. Oligonucleotides used in this study.**

12 **Table S3. Polymorphisms in the *CDR11* CDS.**

13 **Table S4. Polymorphisms in the *QDR1* CDS.**

14 **Table S5. Polymorphisms in the *CDR11* promoter.**

15 **Table S6. Polymorphisms in the *QDR1* promoter.**
